# Supplementary material
Source: MDPI journal article supplement (https://www.mdpi.com/2226-471X/2/4/22)
Supplement: s1 [file s1]

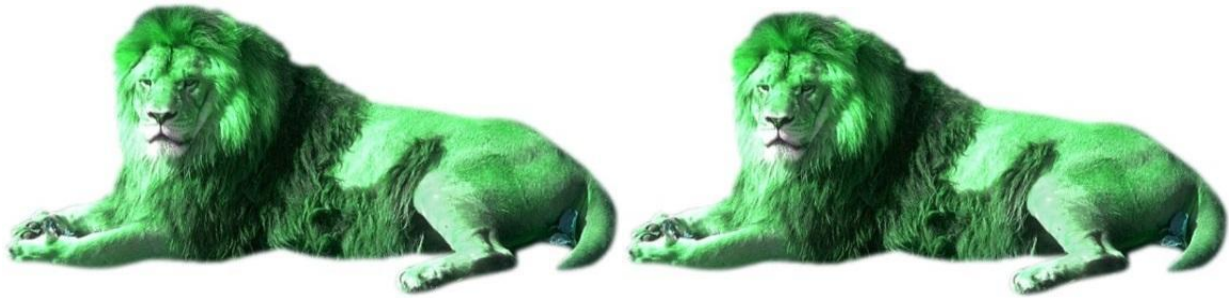

**Figure 1:** Task sample, Picture and stimuli (definite plural NP – *Are the lions green?*; bare NP – *Are lions green?*)

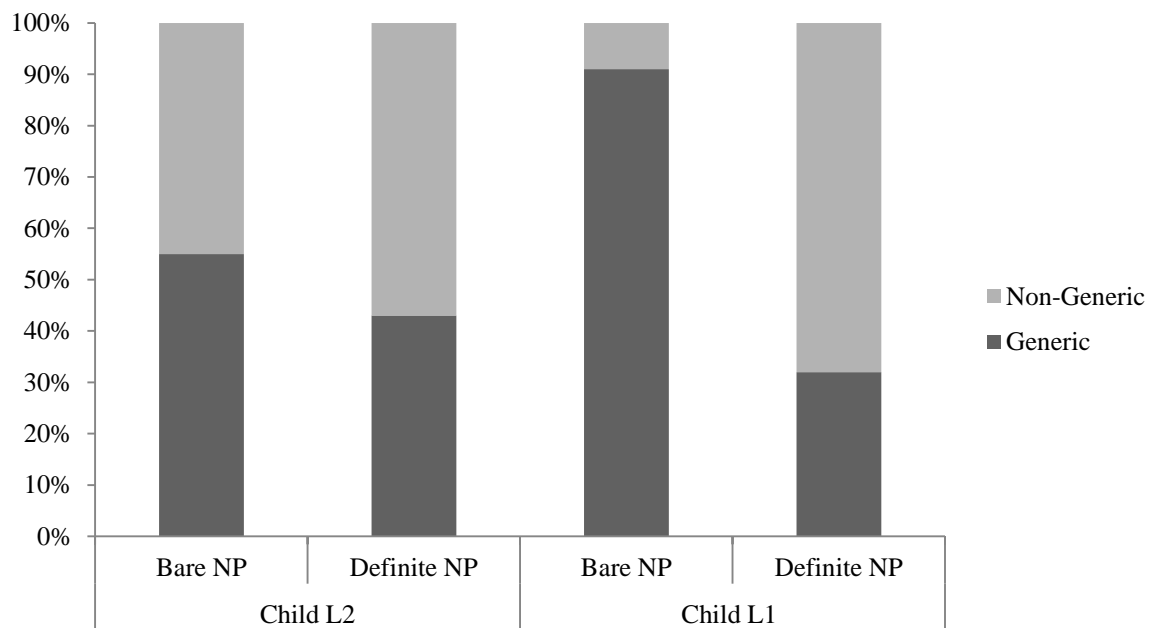

**Figure 2:** Interpretation of bare NPs and definite NPs by L2 and L1 children

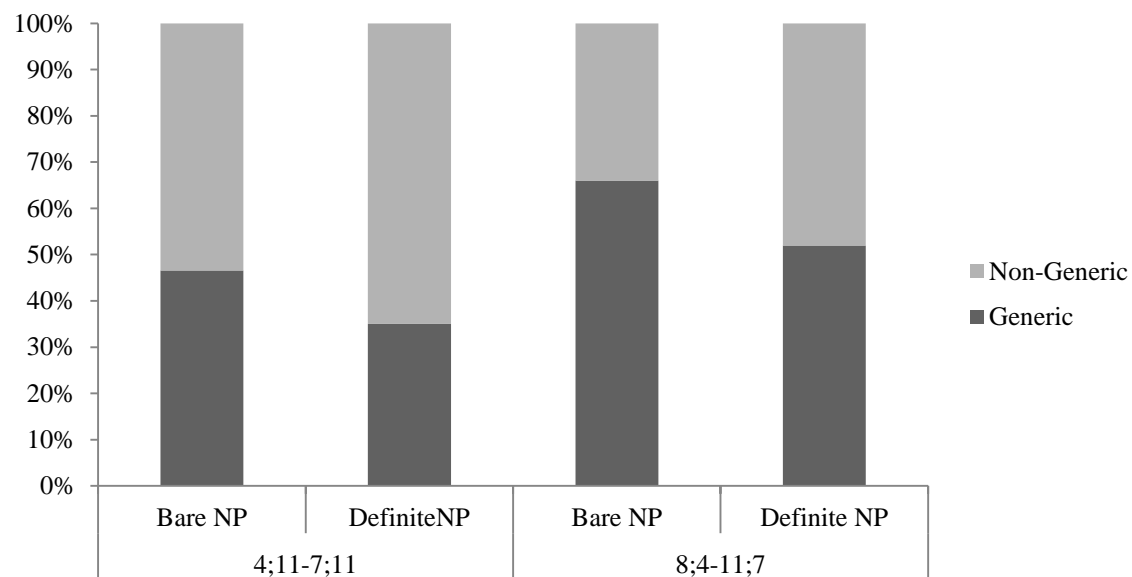

**Figure 3:** Interpretation of definite and bare plural NPs, according to the learner's age

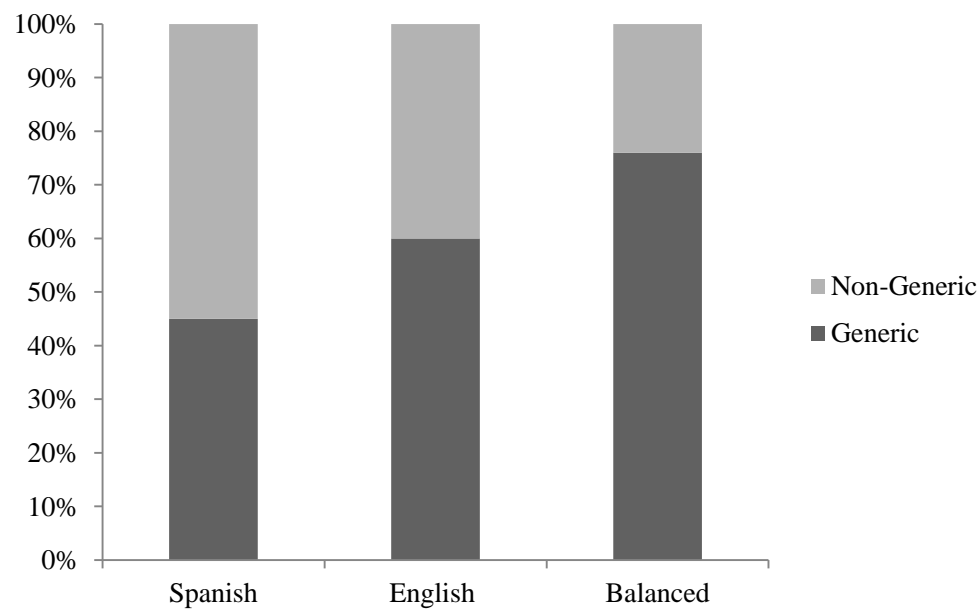

**Figure 4:** Interpretation of bare NPs, according to the amount of input

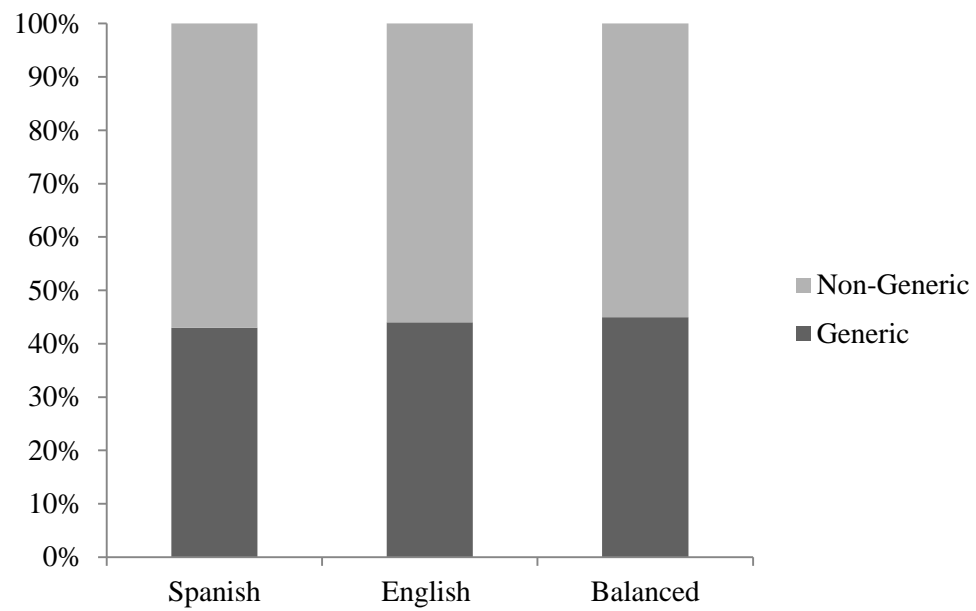

**Figure 5:** Interpretation of bare NPs, according to the amount of input
